# Supplementary material for: Branched CNT@SnO2 nanorods@carbon hierarchical heterostructures for lithium ion batteries with high reversibility and rate capability
Source: Royal Society of Chemistry journal article supplement (doi:10.1039/c4ta03218g), 2014-01-01
Supplement: c4ta03218g1.pdf [file c4ta03218g1.pdf]

## **Branched CNT@SnO<sub>2</sub> nanorods@carbon hierarchical heterostructures for lithium ion batteries with high reversibility and rate capability**

Shuai Chen, Yuelong Xin, Yiyang Zhou, Feng Zhang, Yurong Ma, Henghui Zhou\*  
and Limin Qi\*

*Beijing National Laboratory for Molecular Sciences, State Key Laboratory for Structural Chemistry of Unstable and Stable Species, College of Chemistry, Peking University, Beijing 100871, China.*

### **Electronic supplementary information**

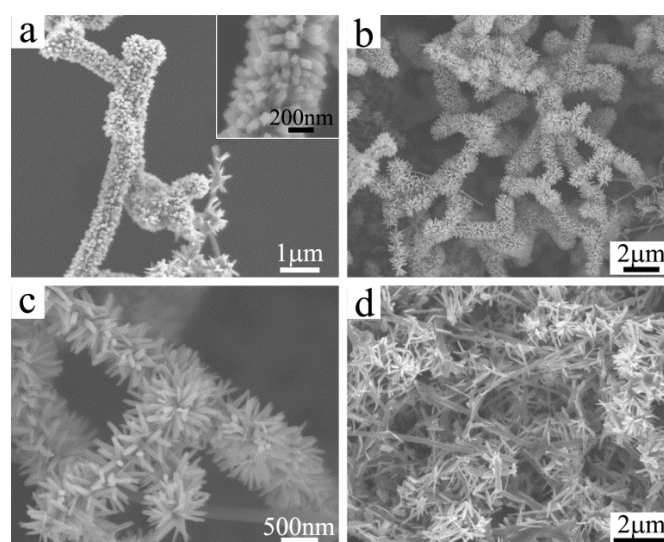

**Fig. S1** SEM images of CNT@SnO<sub>2</sub> heterostructures obtained with different amounts of CNTs: (a) 0.05 mg, (b, c) 2 mg, (d) 4 mg. The inset in (a) shows a high-magnification image.

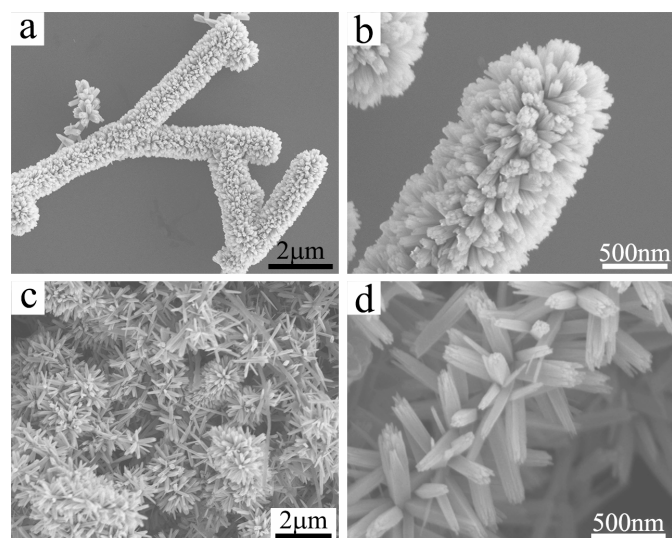

**Fig. S2** SEM images of CNT@SnO<sub>2</sub> heterostructures obtained with different amounts of glacial acetic acid: (a, b) 5 mL, (c, d) 7 mL.

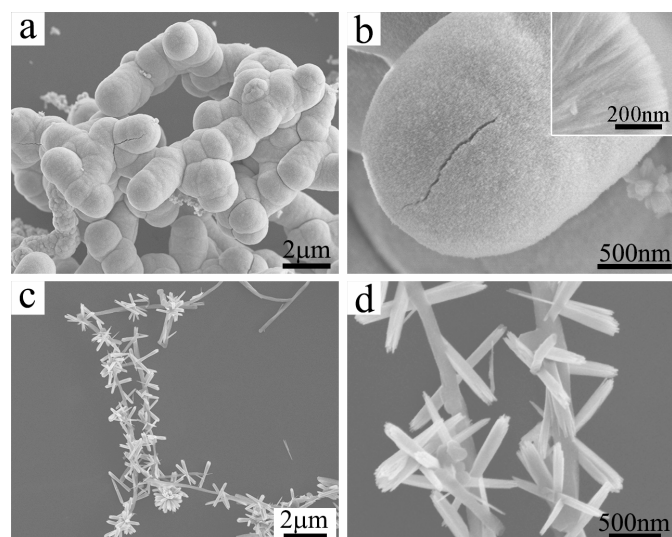

**Fig. S3** SEM images of CNT@SnO<sub>2</sub> heterostructures obtained with different amounts of NaBr: (a, b) 0 mmol, (c, d) 0.35 mmol. Inset shows a cross section the thick SnO<sub>2</sub> shell, suggesting that the SnO<sub>2</sub> shell consists of densely packed rod-like subunits.

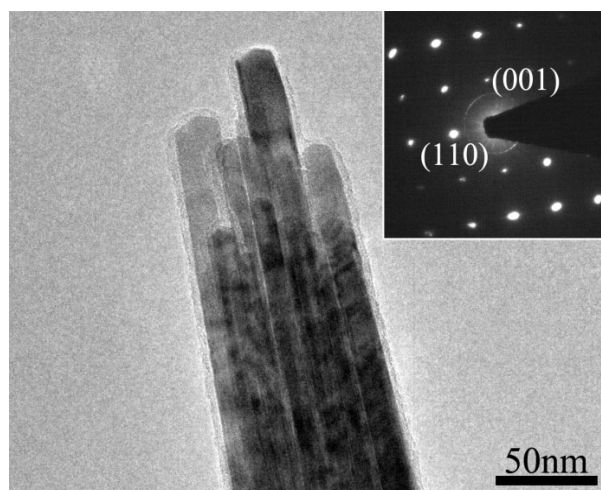

**Fig. S4** TEM image of polymeric carbon-coated SnO<sub>2</sub> nanorod after hydrothermal carbonization of glucose in solution. The inset is the corresponding SAED pattern.

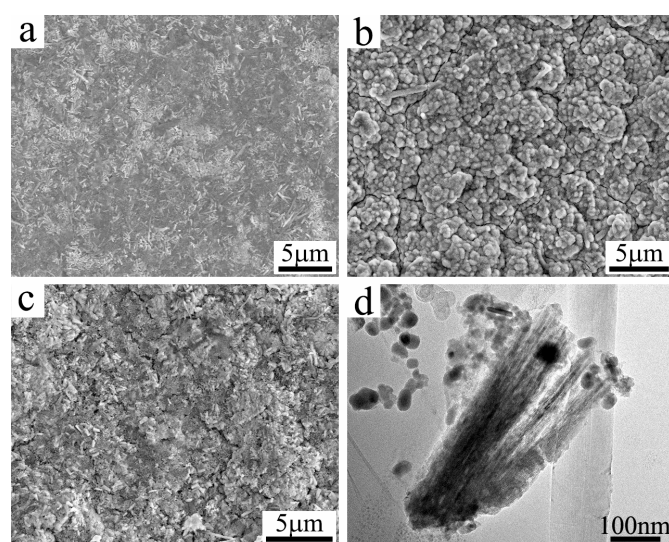

**Fig. S5** (a-c) SEM images of the CNT@SnO<sub>2</sub>@C anode before and after cycling: (a) as prepared, (b) after 40 cycles, (c) after 40 cycles followed by soaking in N-methylpyrrolidone for 2 days to dissolve binder polymers and SEI. (d) TEM image of nanorod bundles separated from the electrode after 40 cycles by ultrasonic treatment.

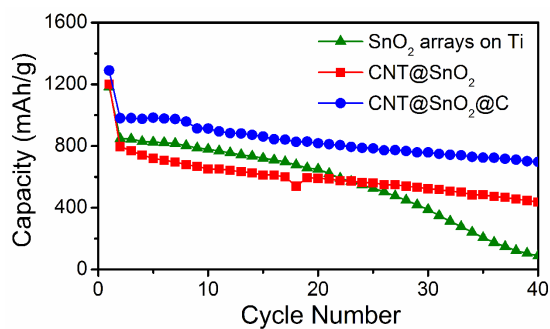

**Fig. S6** Comparative cycling performance of branched  $\text{CNT@SnO}_2\text{@C}$  and  $\text{CNT@SnO}_2$  heterostructures at a current density of  $720 \text{ mA g}^{-1}$  and  $\text{SnO}_2$  nanorod arrays grown on Ti substrate at a current density of  $780 \text{ mA g}^{-1}$ .

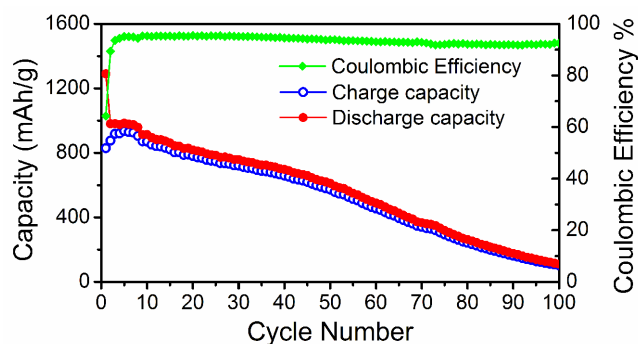

**Fig. S7** Cycling performance of branched  $\text{CNT@SnO}_2\text{@C}$  heterostructures up to 100 cycles at a current density of  $720 \text{ mA g}^{-1}$ .

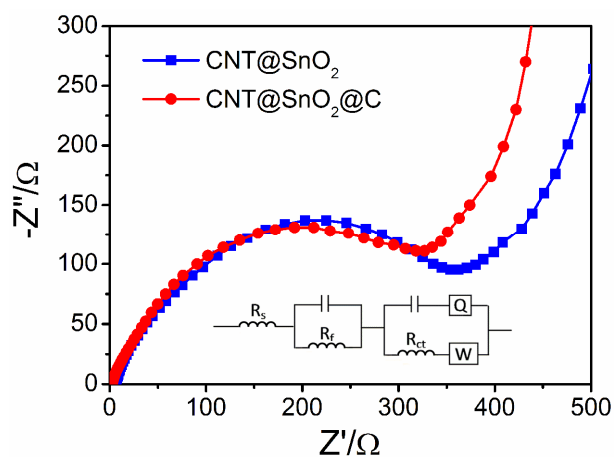

**Fig. S8** Nyquist plots of branched  $\text{CNT@SnO}_2\text{@C}$  and  $\text{CNT@SnO}_2$  heterostructures.
